# Supplementary material for: Synthesis, structure, and catalytic activities of new Cu(i) thiocarboxylate complexes
Source: Royal Society of Chemistry journal article supplement (doi:10.1039/c4ra05290k), 2014-01-01
Supplement: c4ra05290k1.pdf [file c4ra05290k1.pdf]

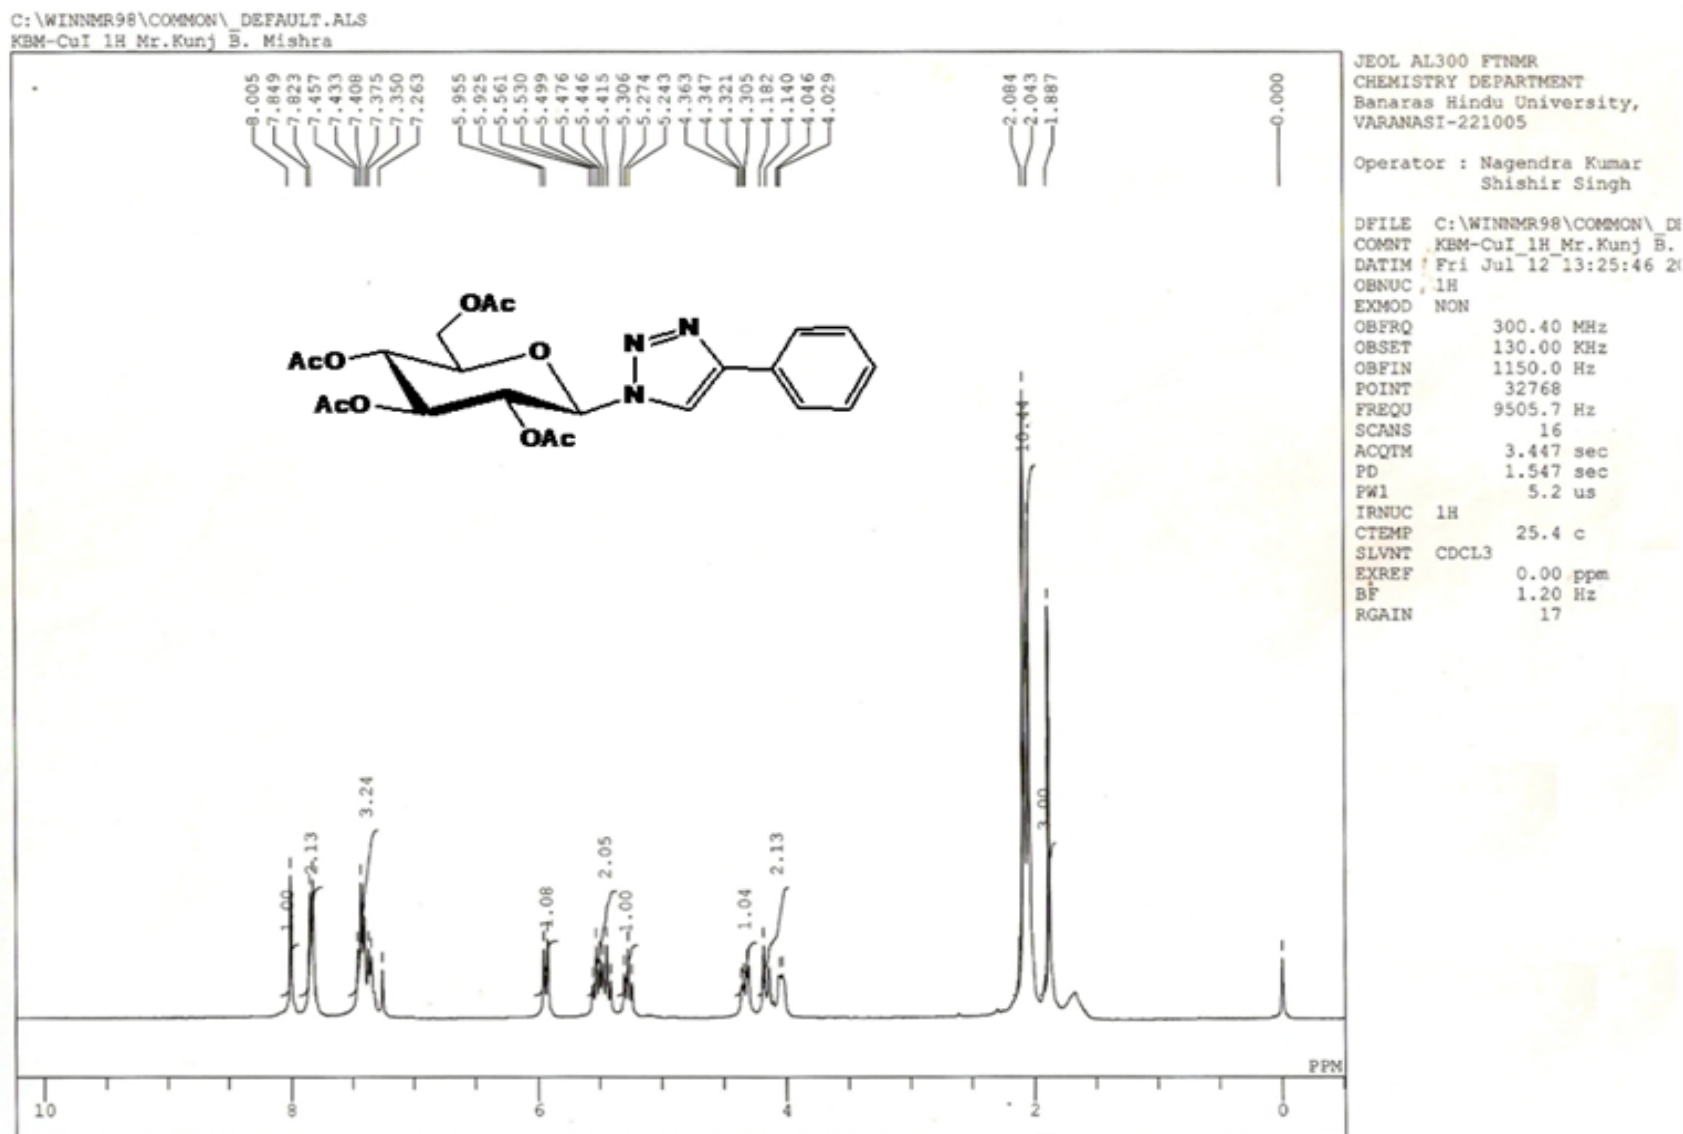

Spectrum 1: 300 MHz <sup>1</sup>H NMR of compound 6a

C:\Kunj B.Mishra\KBM-CuI\_13C.als  
KBM-CuI 13C Mr.Kunj B. Mishra

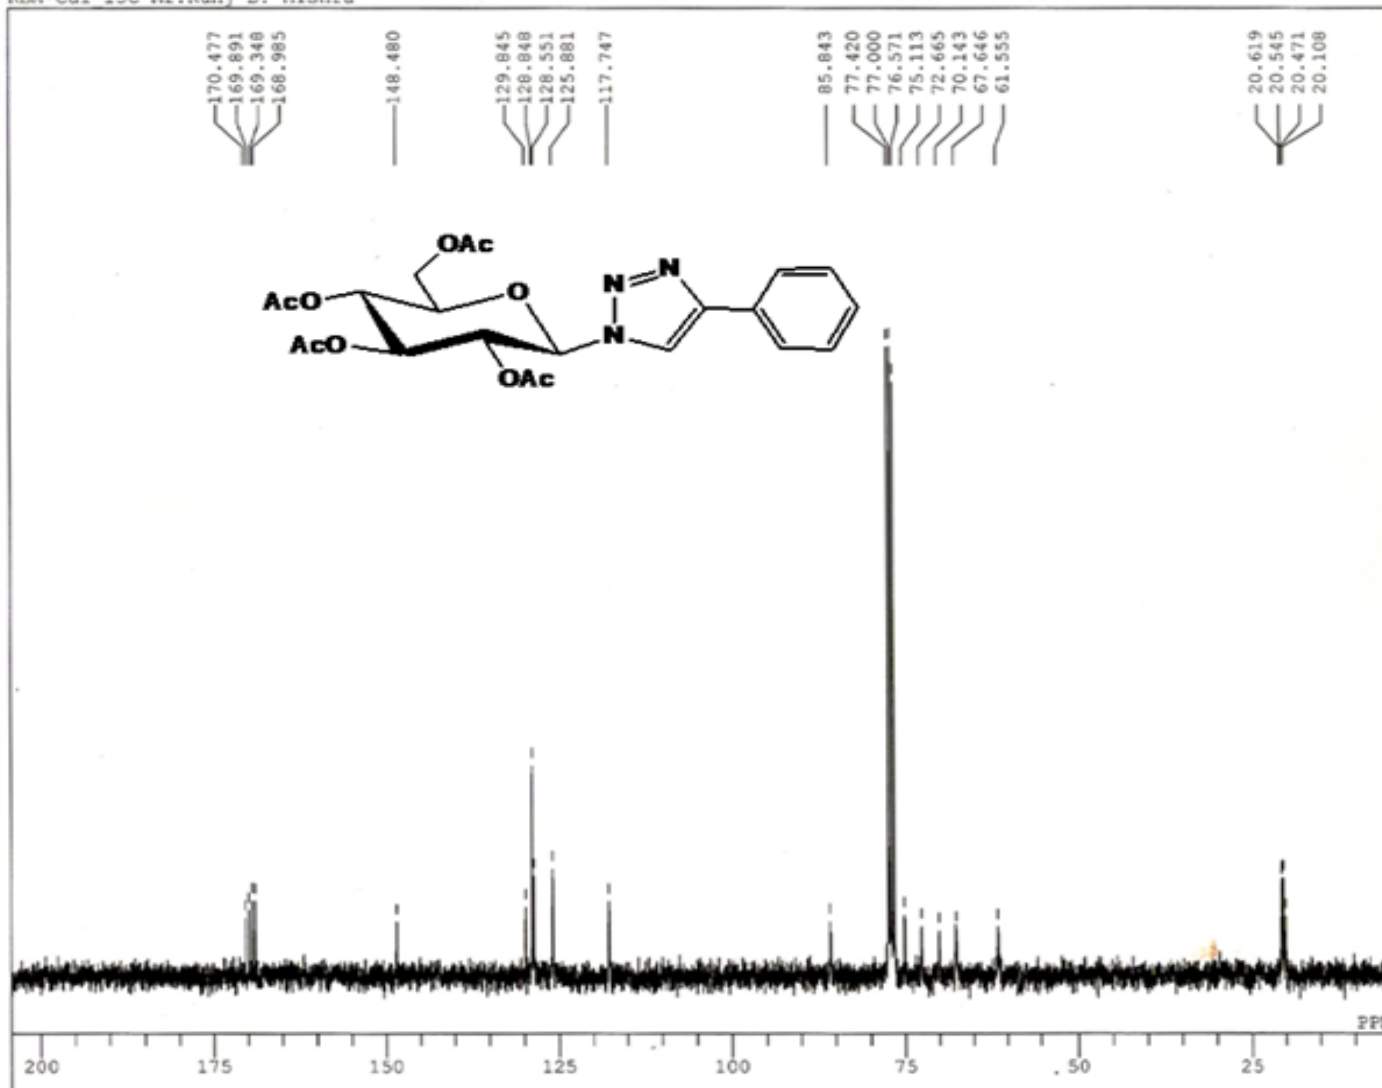

JEOL AL300 FTNMR  
CHEMISTRY DEPARTMENT  
Banaras Hindu University,  
VARANASI-221005

Operator : Nagendra Kumar  
Shishir Singh

DFILE C:\Kunj B.Mishra\KE  
COMNT KBM-CuI\_13C Mr.Kunj  
DATIM Fri Jul 12 13:21:37  
OBNUC 13C  
EXMOD BCM  
OBFRQ 75.45 MHz  
OBSET 124.00 KHz  
OBFIN 1840.0 Hz  
POINT 32768  
FREQU 20408.1 Hz  
SCANS 380  
ACQTM 1.606 sec  
PD 1.394 sec  
PW1 5.9 us  
IRNUC 1H  
CTEMP 23.2 c  
SLVNT CDCL3  
EXREF 77.00 ppm  
BF 1.20 Hz  
RGAIN 23

Spectrum 2: 75 MHz  $^{13}\text{C}$  NMR of compound 6a

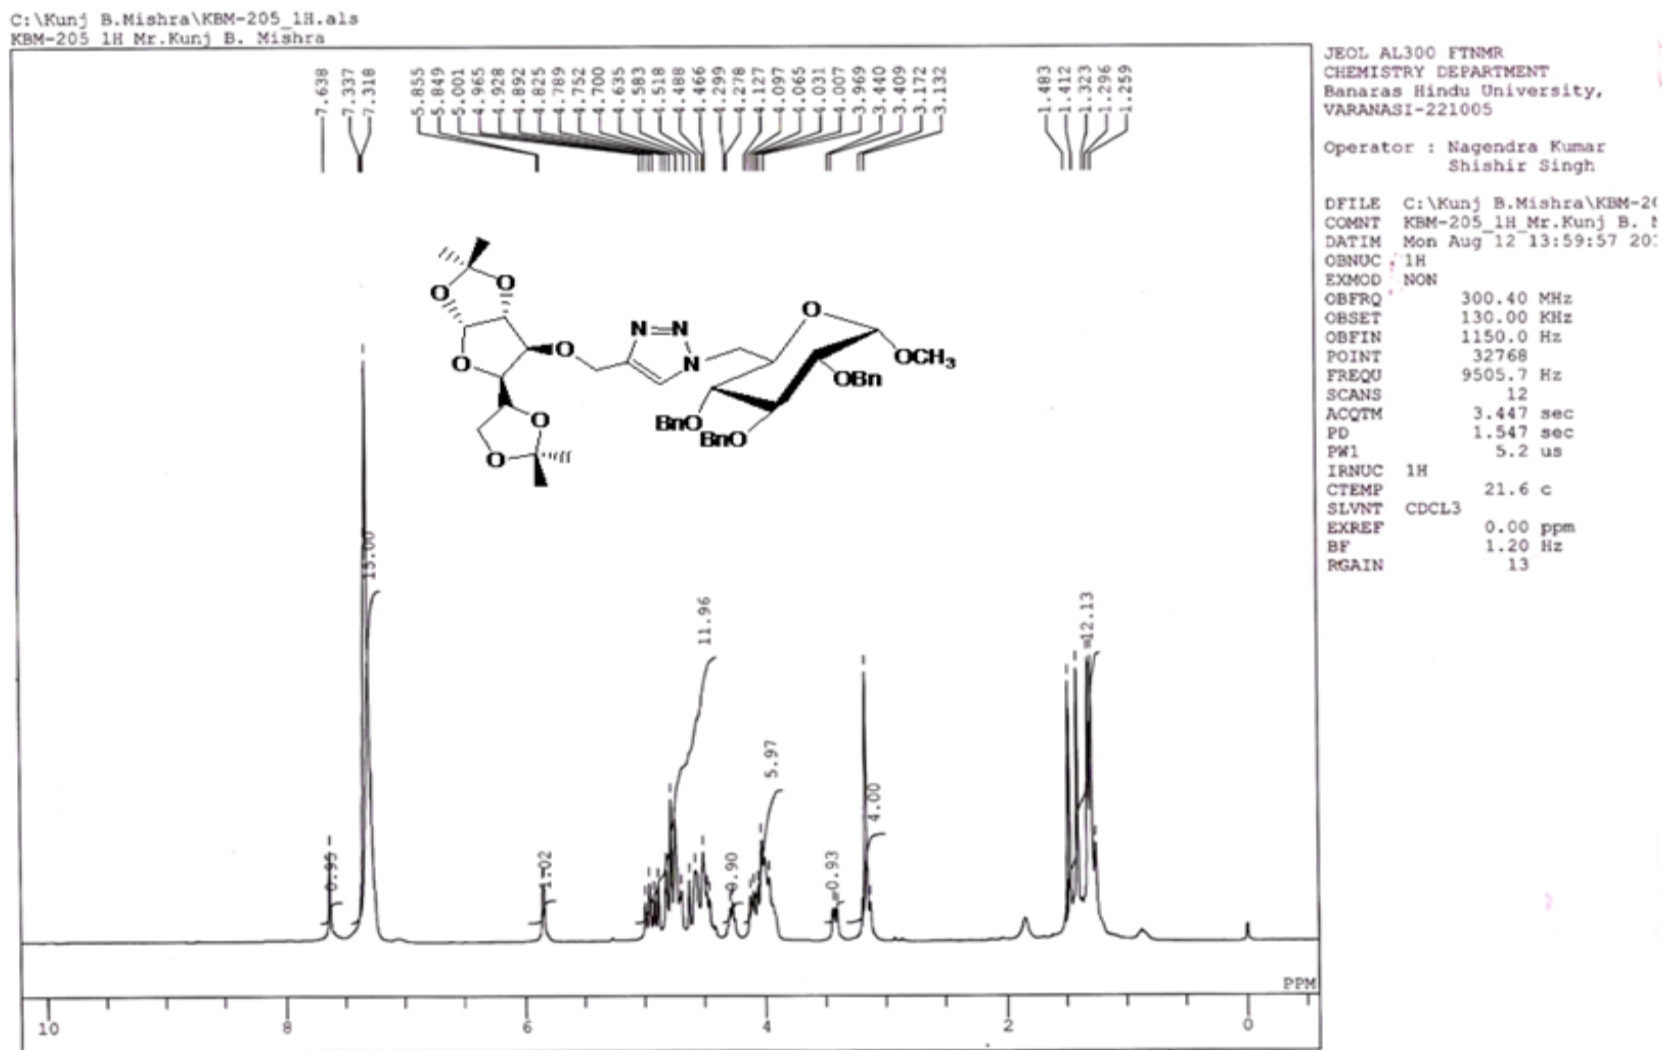Spectrum 3: 300 MHz <sup>1</sup>H NMR of compound 6b

C:\Kunj B.Mishra\KBM-205\_13C\_als  
KBM-205 13C Mr.Kunj B. Mishra

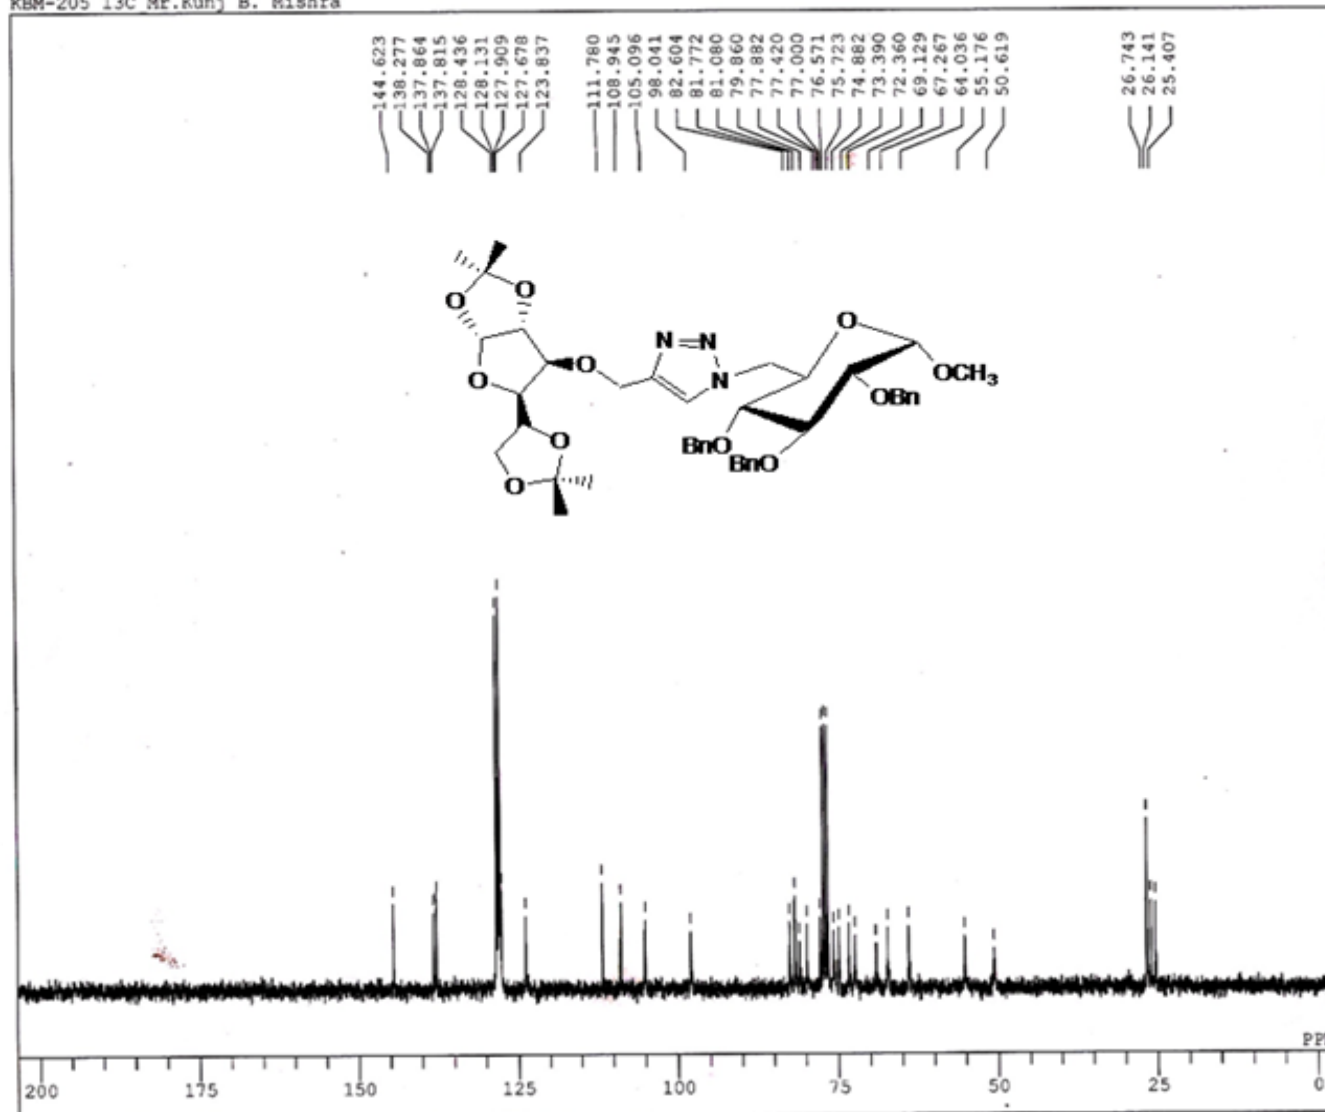

JEOL AL300 FTNMR  
CHEMISTRY DEPARTMENT  
Banaras Hindu University,  
VARANASI-221005

Operator : Nagendra Kumar  
Shishir Singh

DFILE C:\Kunj B.Mishra\KBM-205\_13C\_als  
COMNT KBM-205\_13C\_Mr.Kunj B.  
DATIM Mon Aug 12 13:55:42 20  
OBNUC 13C  
EXMOD BCM  
OBFRQ 75.45 MHz  
OBSET 124.00 KHz  
OBFIN 1840.0 Hz  
POINT 32768  
FREQU 20408.1 Hz  
SCANS 216  
ACQTM 1.606 sec  
PD 1.394 sec  
PW1 5.9 us  
IRNUC 1H  
CTEMP 23.3 c  
SLVNT CDCL3  
EXREF 77.00 ppm  
BF 1.20 Hz  
RGAIN 24

Spectrum 4: 75 MHz  $^{13}\text{C}$  NMR of compound 6b

C:\Kunj B.Mishra\KBM-190\_1H.als  
KBM-190 13C Mr. Kunj Bihari Mishra

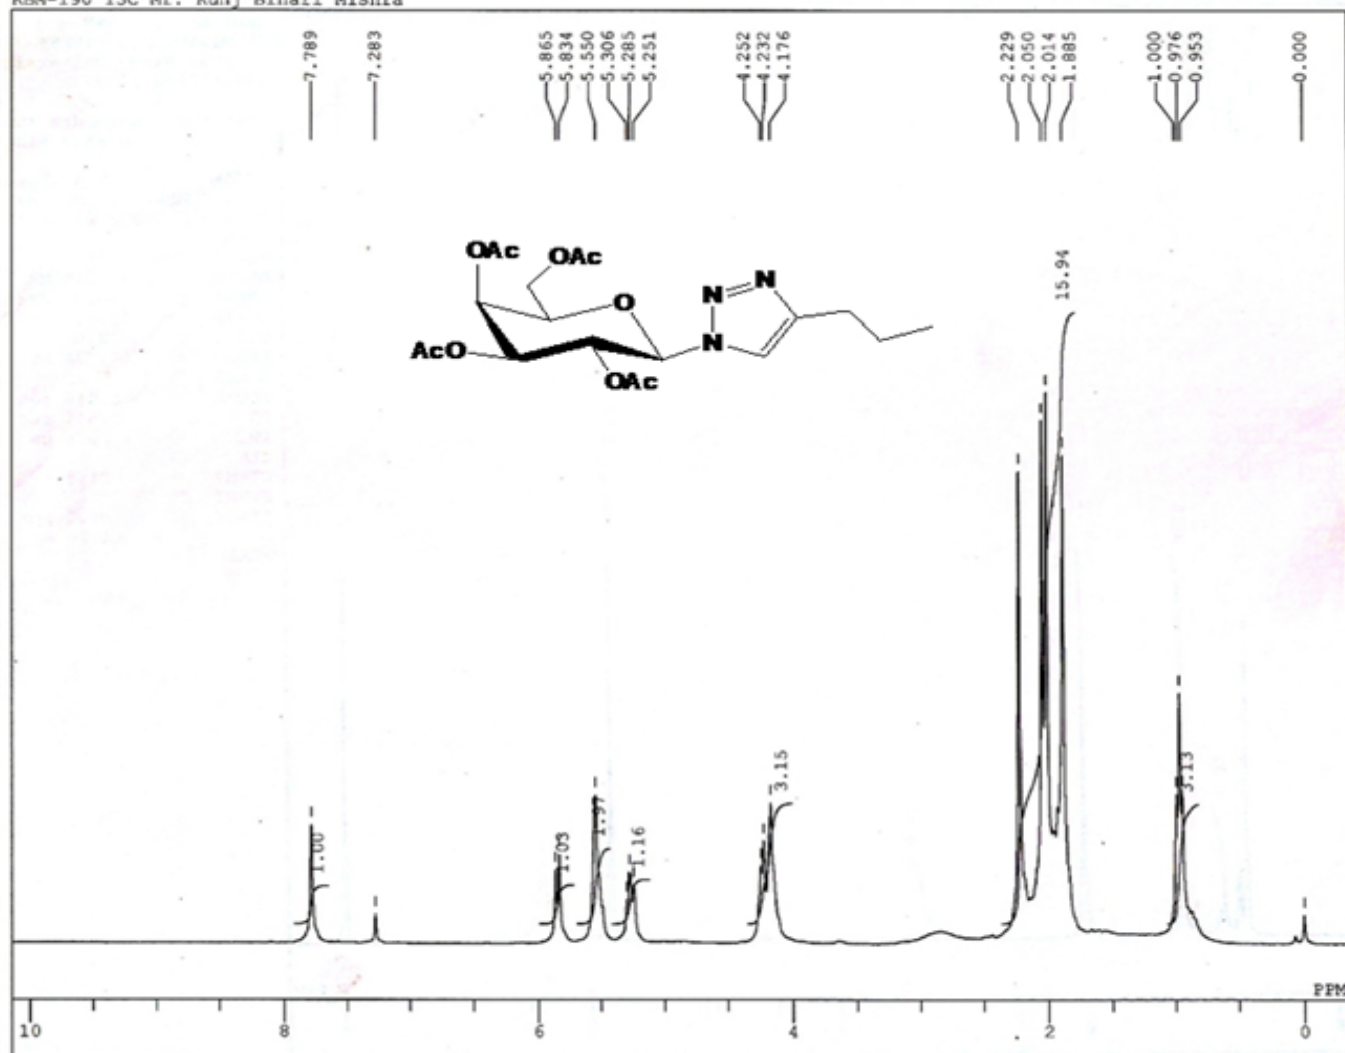

JEOL AL300 FTNMR  
CHEMISTRY DEPARTMENT  
Banaras Hindu University,  
VARANASI-221005

Operator : Nagendra Kumar  
Shishir Singh

DFILE C:\Kunj B.Mishra\KBM-  
COMNT KBM-190 13C Mr. Kunj  
DATIM Wed Jul 31 20:14:43 2  
OBNUC 1H  
EXMOD NON  
OBFRQ 300.40 MHz  
OBSET 130.00 KHz  
OBFIN 1150.0 Hz  
POINT 32768  
FREQU 6016.8 Hz  
SCANS 16  
ACQTM 5.446 sec  
PD 1.547 sec  
PW1 5.6 us  
IRNUC 1H  
CTEMP 21.7 c  
SLVNT CDCL3  
EXREF 0.00 ppm  
BF 1.20 Hz  
RGAIN 16

Spectrum 5: 300 MHz  $^1\text{H}$  NMR of compound **6c**

C:\Kunj B.Mishra\KBM-190\_13C.als  
KBM-190\_13C Mr. Kunj Bihari Mishra

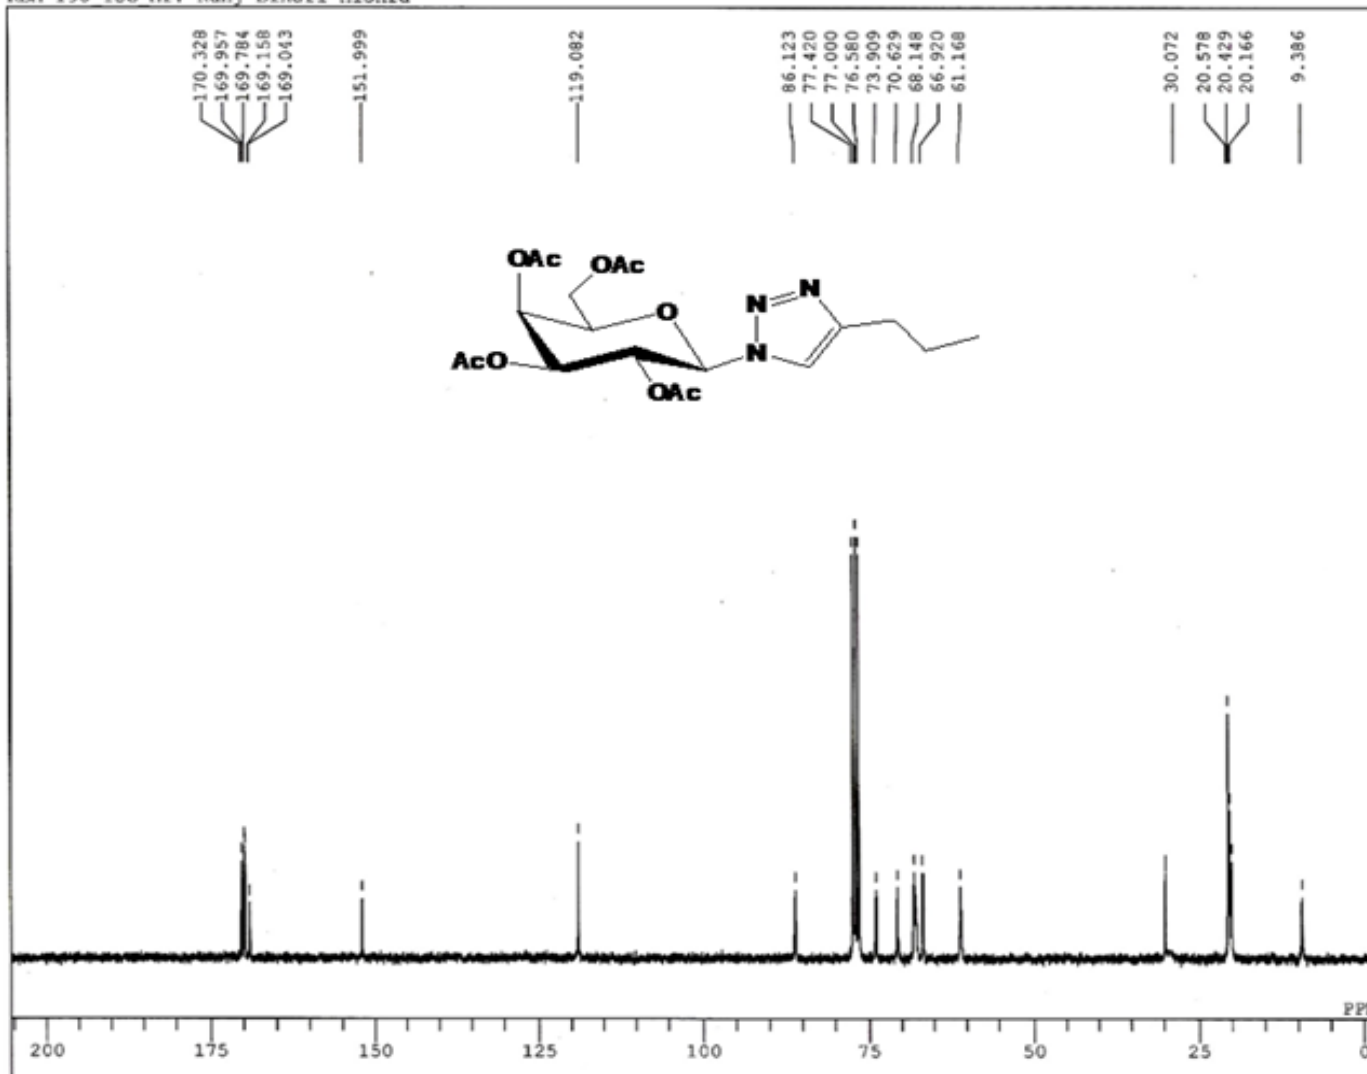

JEOL AL300 FTNMR  
CHEMISTRY DEPARTMENT  
Banaras Hindu University,  
VARANASI-221005

Operator : Nagendra Kumar  
Shishir Singh

DFILE C:\Kunj B.Mishra\KBM  
COMNT KBM-190\_13C Mr. Kunj  
DATIM Wed Jul 31 20:12:14  
CBNUC 13C  
EXMOD BCM  
OBFRQ 75.45 MHz  
OBSET 124.00 KHz  
OBFIN 1840.0 Hz  
POINT 32768  
FREQU 20408.1 Hz  
SCANS 2000  
ACQTM 1.606 sec  
PD 1.394 sec  
PW1 5.9 us  
IRNUC 1H  
CTEMP 23.5 c  
SLVNT CDCL3  
EXREF 77.00 ppm  
BF 1.20 Hz  
RGAIN 24

Spectrum 6: 75 MHz  $^{13}\text{C}$  NMR of compound 6c

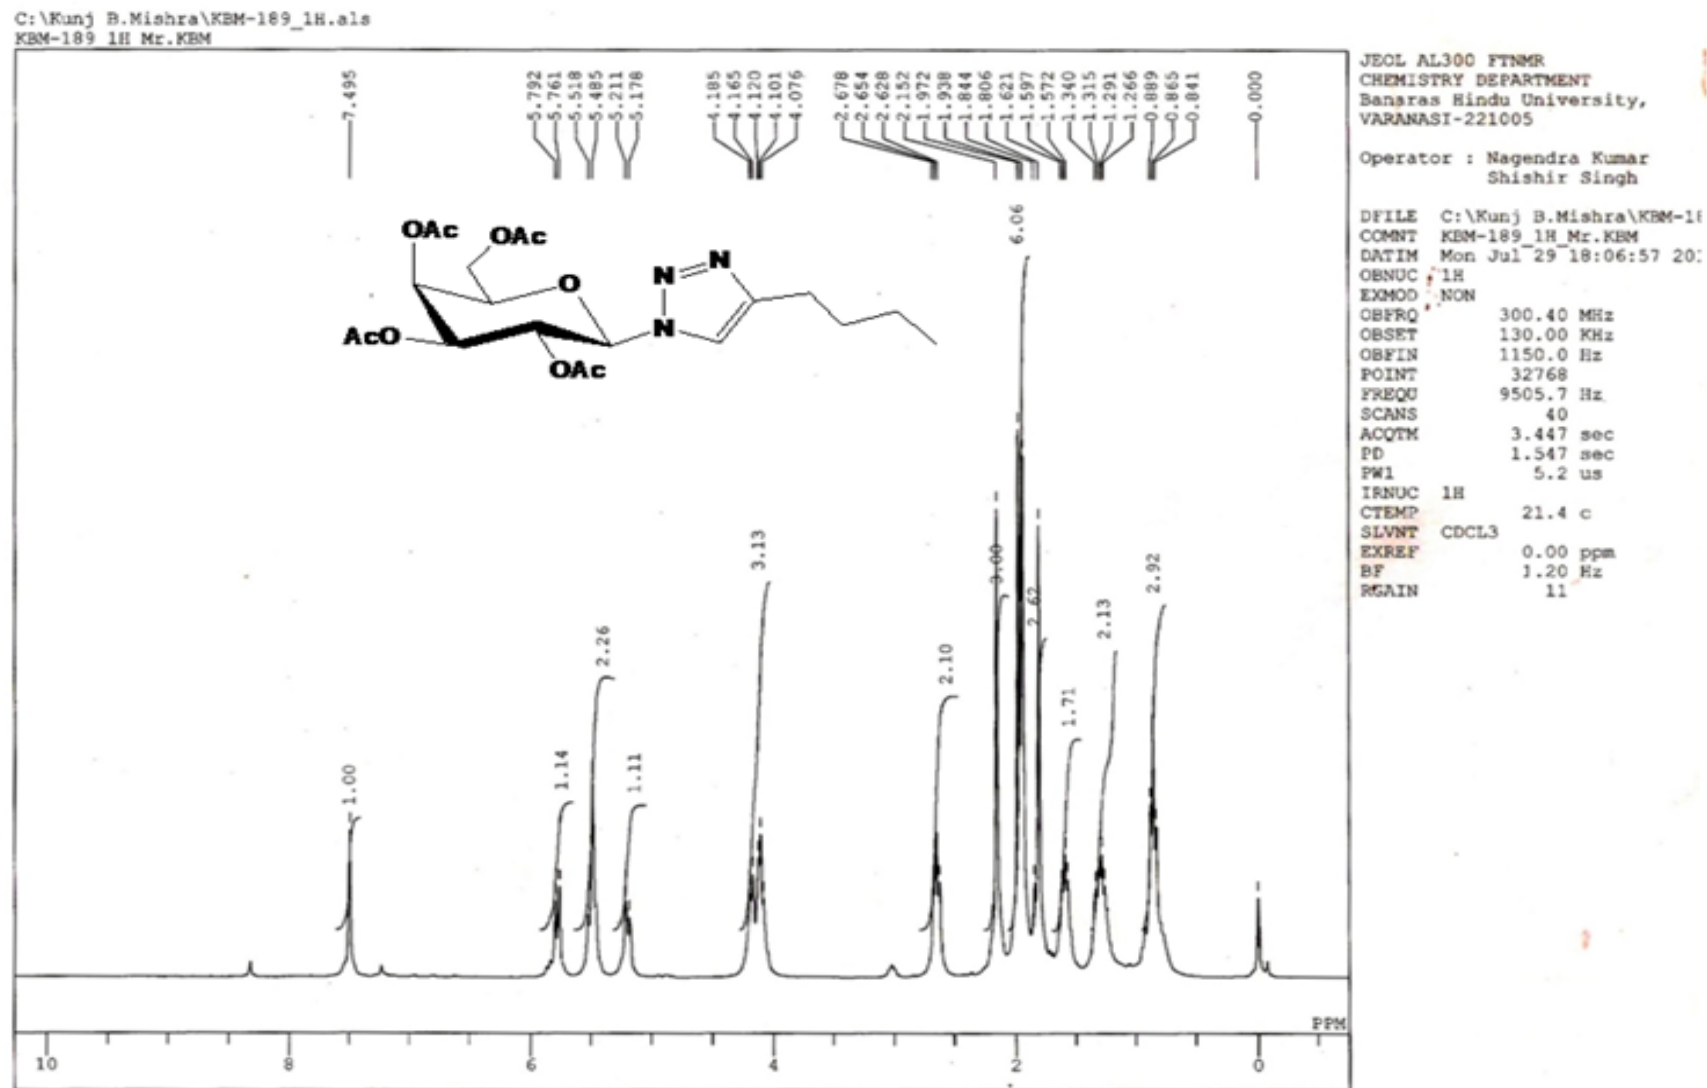Spectrum 7: 300 MHz <sup>1</sup>H NMR of compound 6d



C:\Kunj B.Mishra\KBM-189\_13C\_.als  
KBM-189 1H Mr.KBM

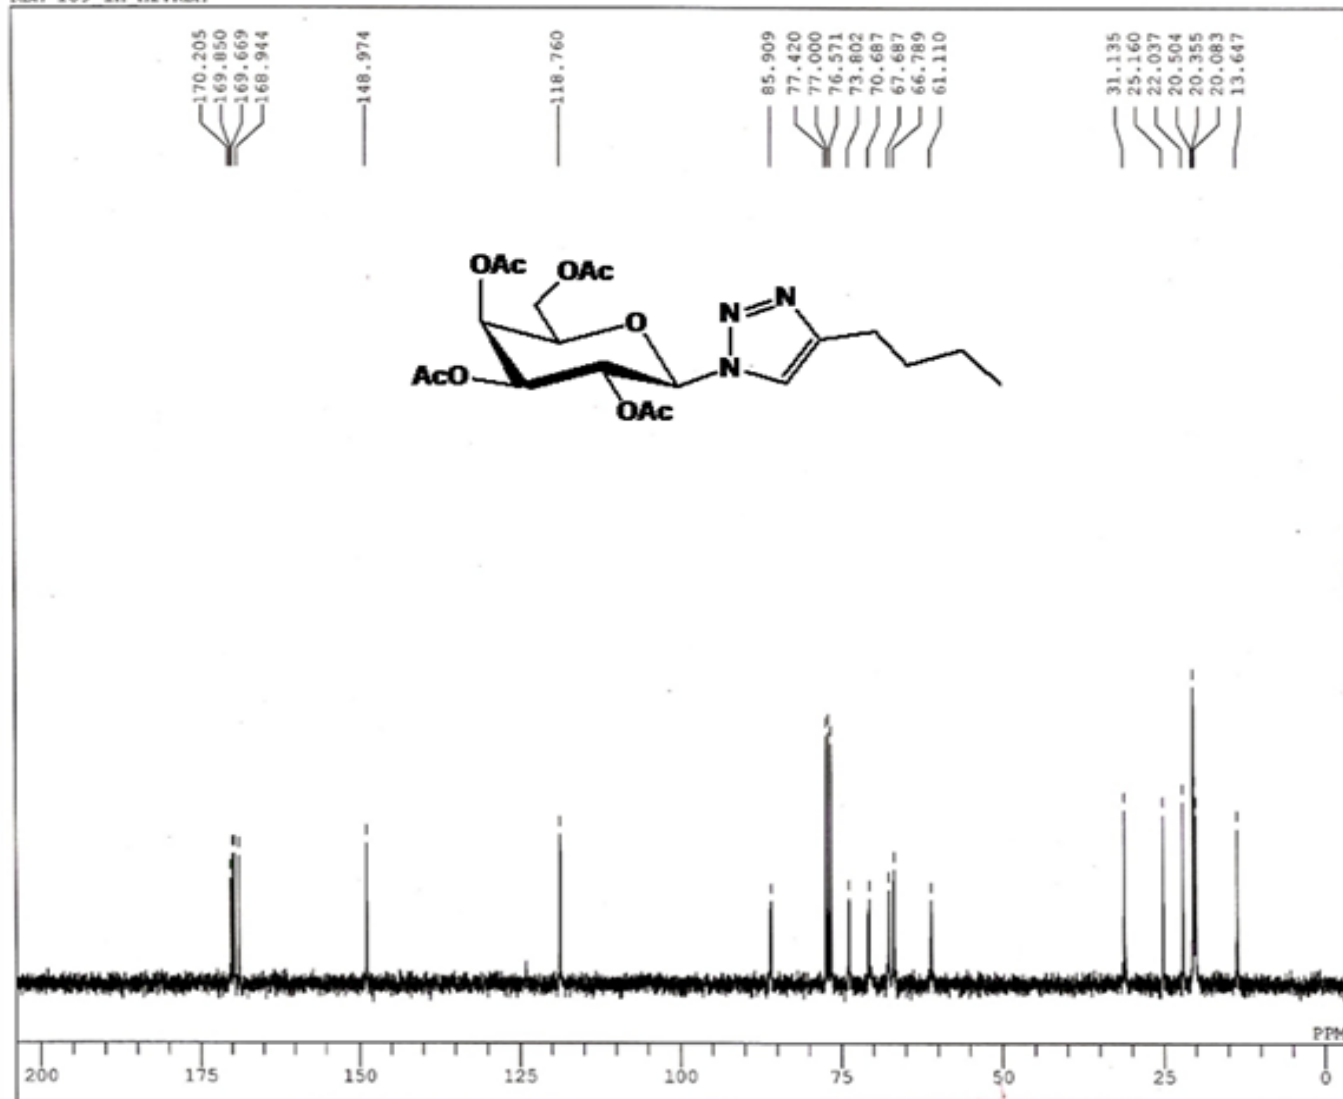

JEOL AL300 FTNMR  
CHEMISTRY DEPARTMENT  
Banaras Hindu University,  
VARANASI-221005

Operator : Nagendra Kumar  
Shishir Singh

DFILE C:\Kunj B.Mishra\KBM-  
COMNT KBM-189\_1H\_Mr.KBM  
DATIM Mon Jul 29 18:15:42  
OBNUC 13C  
EXMOD BCM  
OBFRQ 75.45 MHz  
OBSET 124.00 KHz  
OBFIN 1840.0 Hz  
POINT 32768  
FREQU 20408.1 Hz  
SCANS 125  
ACQTM 1.606 sec  
PD 1.394 sec  
PWL 5.9 us  
IRNUC 1H  
CTEMP 23.5 c  
SLVNT CDCL3  
EXREF 77.00 ppm  
BF 1.20 Hz  
RGAIN 24

Spectrum 8: 75 MHz  $^{13}\text{C}$  NMR of compound 6d



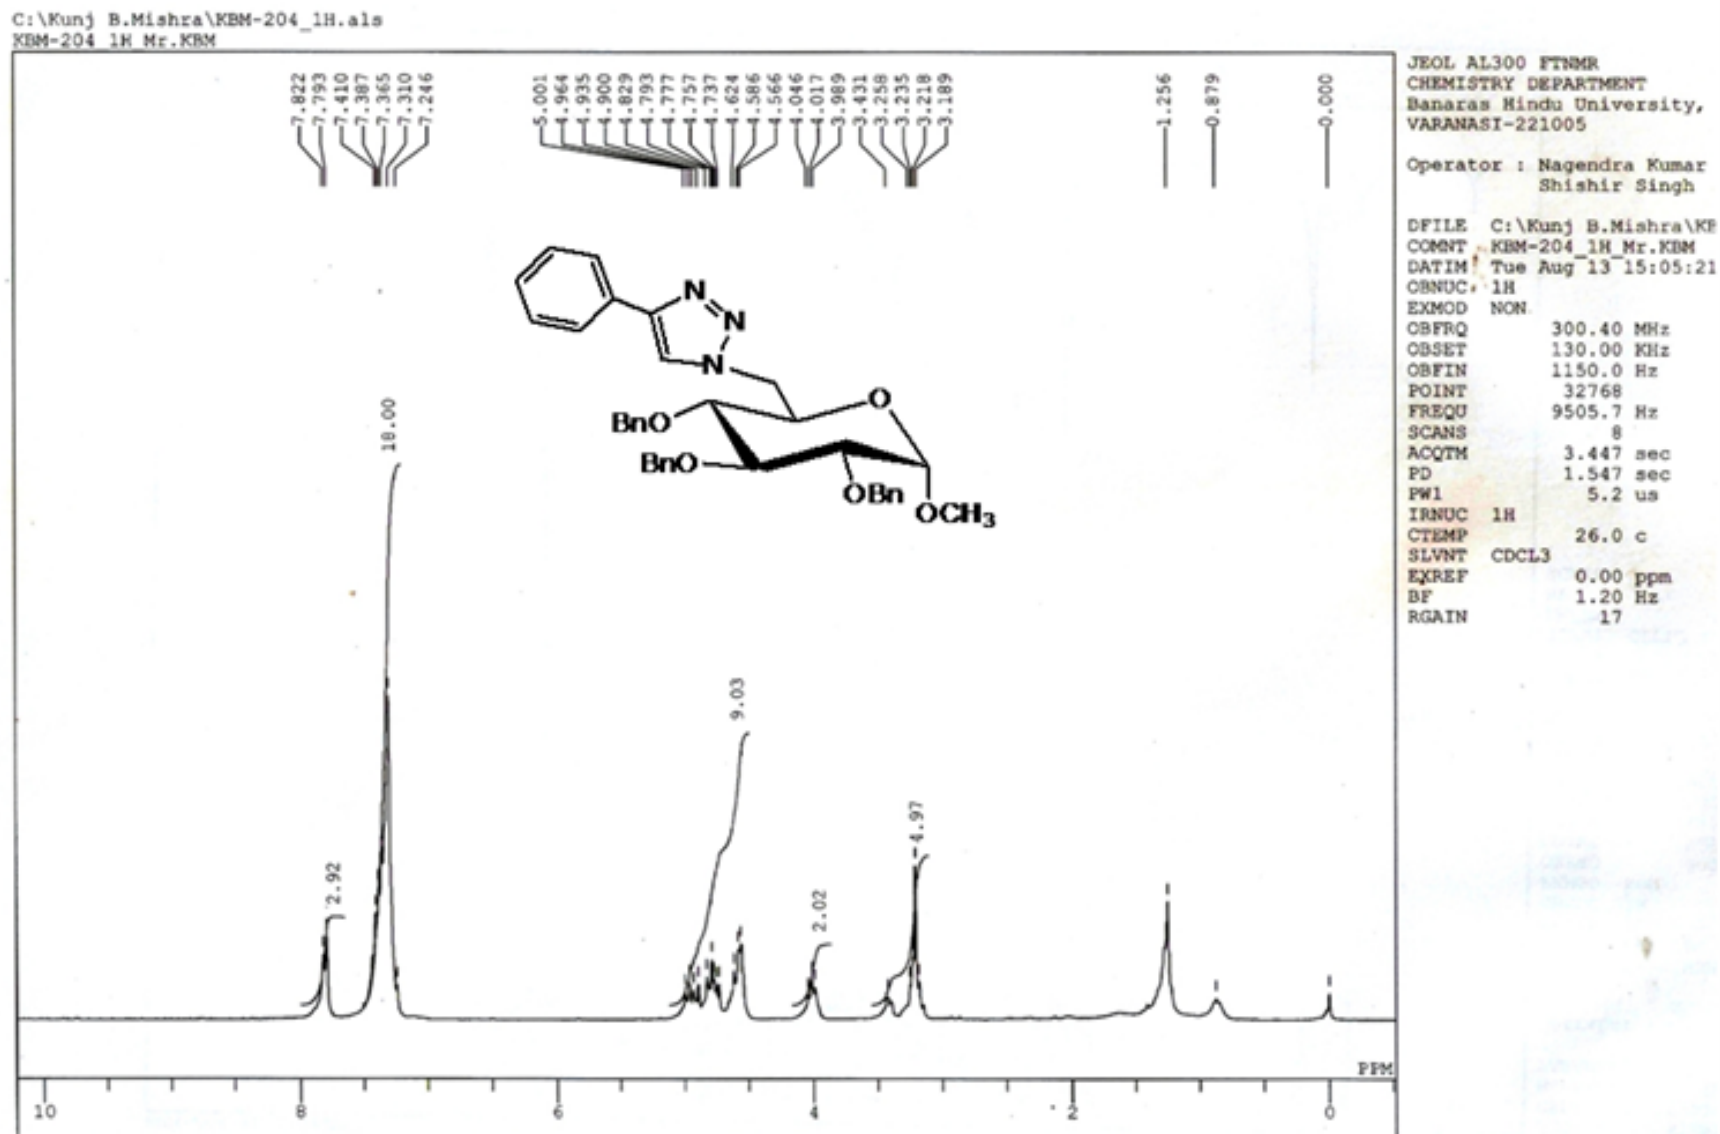Spectrum 9: 300 MHz  $^1\text{H}$  NMR of compound 6e

C:\Kunj B.Mishra\KBM-204\_13C.als  
KBM-204 13C Mr.KBM

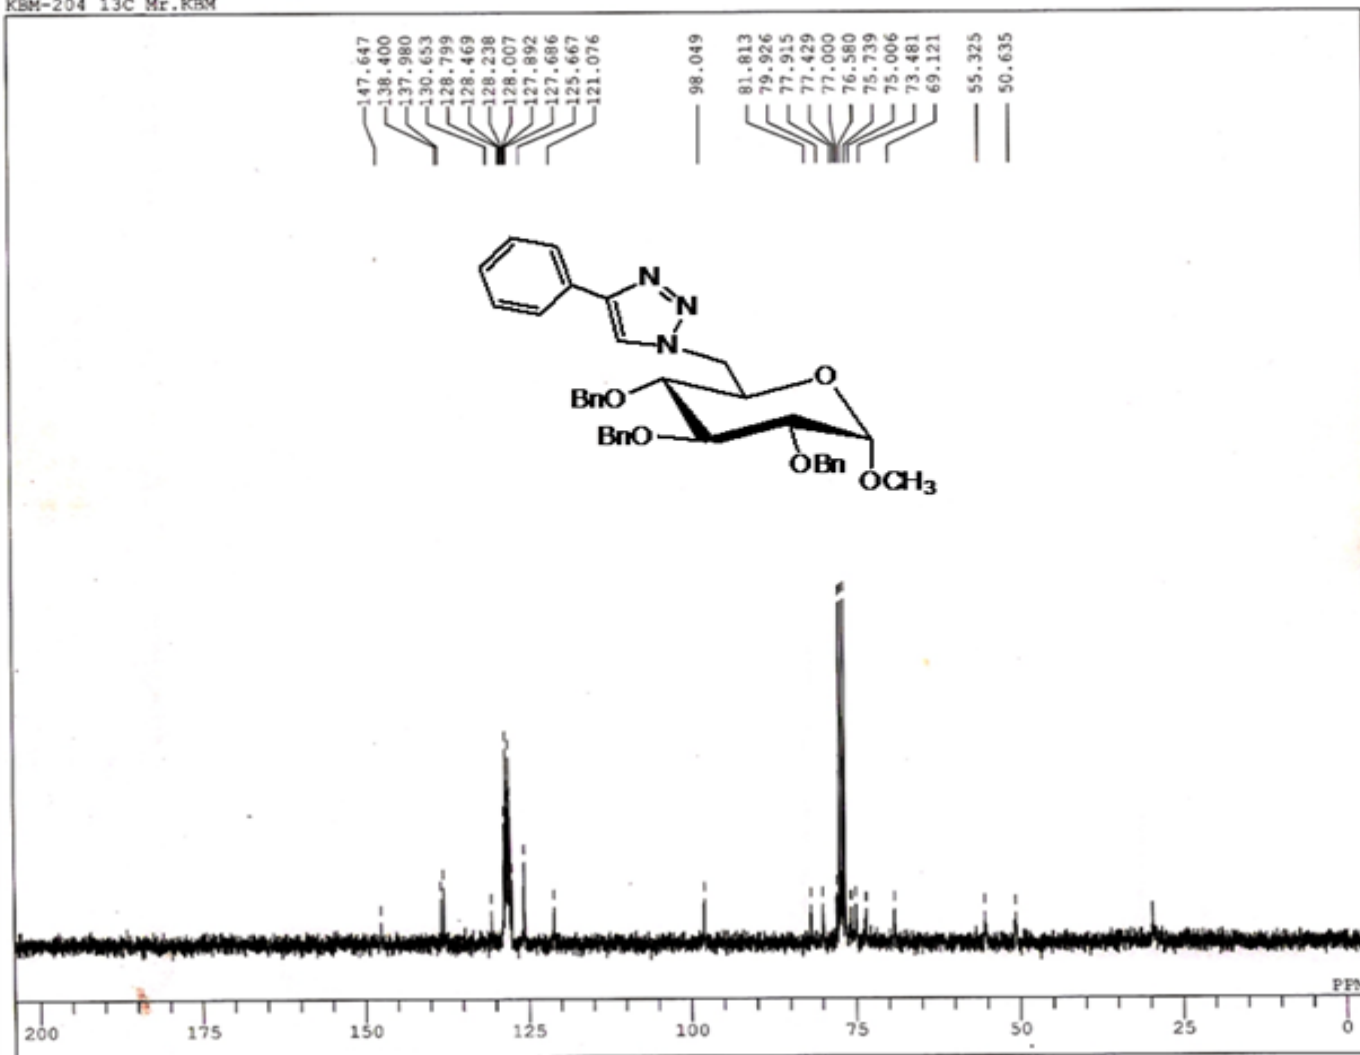

JEOL AL300 FTNMR  
CHEMISTRY DEPARTMENT  
Banaras Hindu University,  
VARANASI-221005

Operator : Nagendra Kumar  
Shishir Singh

DFILE C:\Kunj B.Mishra\KBM-2  
COMNT KBM-204\_13C Mr.KBM  
DATIM Tue Aug 13 15:00:55 20  
OBNUC 13C  
EXMOD BCM  
OBFRQ 75.45 MHz  
OBSET 124.00 KHz  
OBFIN 1840.0 Hz  
POINT 32768  
FREQU 20408.1 Hz  
SCANS 360  
ACQTM 1.606 sec  
PD 1.394 sec  
PWL 5.9 us  
IRNUC 1H  
CTEMP 24.6 c  
SLVNT CDCL3  
EXREF 77.00 ppm  
BF 1.20 Hz  
RGAIN 23

Spectrum 10: 75 MHz  $^{13}\text{C}$  NMR of compound 6e
