# Supplementary material for: Synthesis, structure, and catalytic activities of new Cu(i) thiocarboxylate complexes
Source: Royal Society of Chemistry journal article supplement (doi:10.1039/c4ra05290k), 2014-01-01
Supplement: c4ra05290k2.pdf [file c4ra05290k2.pdf]

**Table S-1**

**Occupancies of various Cu orbitals**

| NAO | Atom | No | lang   | Type (AO) | Occupancy | Energy     |
|-----|------|----|--------|-----------|-----------|------------|
| 459 | Cu   | 31 | S      | Cor ( 1s) | 2.00000   | -285.60300 |
| 460 | Cu   | 31 | S      | Cor ( 2s) | 2.00000   | -74.43002  |
| 461 | Cu   | 31 | S      | Cor ( 3s) | 1.99737   | -5.88855   |
| 462 | Cu   | 31 | S      | Val ( 4s) | 0.35151   | 0.16900    |
| 463 | Cu   | 31 | S      | Ryd ( 5s) | 0.00405   | 0.98476    |
| 464 | Cu   | 31 | S      | Ryd ( 6s) | 0.00121   | 1.42117    |
| 465 | Cu   | 31 | S      | Ryd ( 7s) | 0.00001   | 39.51317   |
| 466 | Cu   | 31 | px     | Cor ( 2p) | 2.00000   | -33.90856  |
| 467 | Cu   | 31 | px     | Cor ( 3p) | 1.99921   | -2.82301   |
| 468 | Cu   | 31 | px     | Val ( 4p) | 0.24525   | 0.25100    |
| 469 | Cu   | 31 | px     | Ryd ( 5p) | 0.00521   | 0.83654    |
| 470 | Cu   | 31 | px     | Ryd ( 6p) | 0.00165   | 1.67109    |
| 471 | Cu   | 31 | py     | Cor ( 2p) | 2.00000   | -33.90763  |
| 472 | Cu   | 31 | py     | Cor ( 3p) | 1.99944   | -2.82311   |
| 473 | Cu   | 31 | py     | Val ( 4p) | 0.22729   | 0.16890    |
| 474 | Cu   | 31 | py     | Ryd ( 5p) | 0.00375   | 0.48305    |
| 475 | Cu   | 31 | py     | Ryd ( 6p) | 0.00101   | 1.67344    |
| 476 | Cu   | 31 | pz     | Cor ( 2p) | 2.00000   | -33.90447  |
| 477 | Cu   | 31 | pz     | Cor ( 3p) | 1.99942   | -2.81946   |
| 478 | Cu   | 31 | pz     | Val ( 4p) | 0.19593   | 0.17359    |
| 479 | Cu   | 31 | pz     | Ryd ( 5p) | 0.00376   | 0.50300    |
| 480 | Cu   | 31 | pz     | Ryd ( 6p) | 0.00105   | 1.57752    |
| 481 | Cu   | 31 | dxy    | Val ( 3d) | 1.90400   | -0.19862   |
| 482 | Cu   | 31 | dxy    | Ryd ( 4d) | 0.00012   | 2.41794    |
| 483 | Cu   | 31 | dxz    | Val ( 3d) | 1.90997   | -0.19492   |
| 484 | Cu   | 31 | dxz    | Ryd ( 4d) | 0.00017   | 2.44080    |
| 485 | Cu   | 31 | dyz    | Val ( 3d) | 1.92056   | -0.19484   |
| 486 | Cu   | 31 | dyz    | Ryd ( 4d) | 0.00009   | 2.36721    |
| 487 | Cu   | 31 | dx2y2  | Val ( 3d) | 1.81383   | -0.19031   |
| 488 | Cu   | 31 | dx2y2  | Ryd ( 4d) | 0.00018   | 2.37324    |
| 489 | Cu   | 31 | dz2    | Val ( 3d) | 1.93247   | -0.19648   |
| 490 | Cu   | 31 | dz2    | Ryd ( 4d) | 0.00006   | 2.28379    |
| 491 | Cu   | 31 | f (0)  | Ryd ( 4f) | 0.00009   | 2.55209    |
| 492 | Cu   | 31 | f (C1) | Ryd ( 4f) | 0.00004   | 2.53941    |
| 493 | Cu   | 31 | f (S1) | Ryd ( 4f) | 0.00003   | 2.53952    |
| 494 | Cu   | 31 | f (C2) | Ryd ( 4f) | 0.00010   | 2.63936    |
| 495 | Cu   | 31 | f (S2) | Ryd ( 4f) | 0.00006   | 2.58967    |
| 496 | Cu   | 31 | f (C3) | Ryd ( 4f) | 0.00011   | 2.56018    |
| 497 | Cu   | 31 | f (S3) | Ryd ( 4f) | 0.00008   | 2.56931    |

**Natural electronic configurations**

Cu 31 [core]4s ( 0.35) 3d ( 9.48) 4p ( 0.67) 5p ( 0.01)  
 Cu 32 [core]4s ( 0.34) 3d ( 9.50) 4p ( 0.61) 5p ( 0.01)
